# Supplementary material for: Effects of a social cue on reproductive development and pre-alternate molt in seasonally breeding migrant and resident female songbirds (Zonotrichia leucophrys)
Source: Oxford University Press journal article supplement (doi:10.1242/jeb.160994), 2017-08-15
Supplement: jeb160994supp.pdf [file jeb160994supp.pdf]

**Table S1. Summary of model selection results.**

| Model Structure                                                                  | <i>-loglik</i> | AIC    | $\Delta$ AICc | p>ChiSq. |
|----------------------------------------------------------------------------------|----------------|--------|---------------|----------|
| <b>Luteinizing hormone models (all birds- song experiment)</b>                   |                |        |               |          |
| Subspecies, Time                                                                 | -204.2         | 420.5  | 0             |          |
| Subspecies, Time, Song                                                           | -203.9         | 421.8  | 1.3           | 0.405    |
| Subspecies , Time, Song and Song*Time                                            | -202.9         | 421.9  | 1.4           |          |
| Subspecies, Time, Song and Species*Time, Song*Time                               | -202.2         | 422.5  | 2             |          |
| Subspecies, Time, Song and all 2 way interactions                                | -202.2         | 424.4  | 3.9           |          |
| Subspecies, Time, Song and all 2 and 3 way interactions                          | -202.2         | 426.4  | 5.9           |          |
| Date                                                                             | -209.2         | 428.5  | 8             |          |
| <b>Follicle stage score models (all birds- song experiment)</b>                  |                |        |               |          |
| Subspecies, Time, Song and all 2 and 3 way interactions                          | -184.1         | 396.2  | 0             |          |
| *Interaction terms significant, full model retained                              |                |        |               |          |
| <b>Terminal ovary mass models (all birds- song experiment)</b>                   |                |        |               |          |
| <i>Subspecies, Structural size and Interaction *post hoc supplementary model</i> | 60.2           | -108.4 |               |          |
| Subspecies                                                                       | 56.9           | -105.9 | 0             |          |
| Subspecies and Song                                                              | 57.5           | -105.1 | 0.8           | 0.27     |
| Subspecies, Song and Interaction                                                 | 57.9           | -103.9 | 2             |          |
| Null model                                                                       | 53.9           | -101.9 | 4             |          |
| <b>Terminal oviduct mass models (all birds- song experiment)</b>                 |                |        |               |          |
| <i>Subspecies, Structural size and Interaction *post hoc supplementary model</i> | 13.1           | -14.2  |               |          |
| Subspecies                                                                       | 10.3           | -12.7  | 0             |          |
| Null model                                                                       | 8.6            | -11.2  | 1.5           | 0.062    |
| Subspecies and Song                                                              | 10.6           | -11.1  | 1.6           |          |
| Subspecies, Song and Interaction                                                 | 10.7           | -9.5   | 3.2           |          |
| <b>Terminal follicle size models (all birds- song experiment)</b>                |                |        |               |          |
| <i>Subspecies, Structural size and Interaction *post hoc supplementary model</i> | -47.3          | 106.6  |               |          |
| Subspecies                                                                       | -51.9          | 111.8  | 0             |          |
| Subspecies and Song                                                              | -51.7          | 113.4  | 1.4           | 0.522    |
| Subspecies, Song and Interaction                                                 | -51.7          | 115.4  | 3.8           |          |
| Null model                                                                       | -59.1          | 124.8  | 13            |          |
| <b>Mass index models (all birds-song experiment)</b>                             |                |        |               |          |
| Subspecies, Time, and Subspecies*Time                                            | -892           | 1798.1 | 0             |          |
| Subspecies, Time, Song, and Subspecies*Time                                      | -891.5         | 1799.1 | 1             | 0.3249   |
| Subspecies, Time, Song, Subspecies*Time, and Song*Time                           | -891.1         | 1800.2 | 2.1           |          |
| Subspecies, Time, Song and all 2 way                                             | -891           | 1802   | 3.9           |          |

|                                                                            |        |        |      |        |
|----------------------------------------------------------------------------|--------|--------|------|--------|
| interactions                                                               |        |        |      |        |
| Subspecies, Time, Song and all 2 and 3 way interactions                    | -890.8 | 1803.6 | 5.5  |        |
| Subspecies and Time                                                        | -931.4 | 1874.8 | 86.7 |        |
| <b>Molt score jd 90 models (migrants only- song experiment)</b>            |        |        |      |        |
| Song                                                                       | -30.6  | 75.1   | 0    | 0.0575 |
| Null model                                                                 | -32.4  | 76.7   | 1.6  |        |
| <b>Molt score jd 104 models (migrants only- song experiment)</b>           |        |        |      |        |
| Song                                                                       | 29.4   | 72.8   | 0    | 0.0245 |
| Null model                                                                 | -31.9  | 75.8   | 3    |        |
| <b>Luteinizing hormone models (migrants only- live male experiment)</b>    |        |        |      |        |
| Time                                                                       | -10.6  | 31.2   | 0    | 0.548  |
| Time and Live male                                                         | --10.0 | 34.0   | 2.8  |        |
| Time, Live male and Interaction                                            | -9.0   | 36.0   | 4.8  |        |
| Null model                                                                 | -16.8  | 41.5   | 10.3 |        |
| <b>Follicle stage score models (migrants only- live male experiment)</b>   |        |        |      |        |
| Time, Live male or Song and Interaction                                    | -105.6 | 233.1  |      |        |
| *Interaction term significant, full model retained                         |        |        |      |        |
| <b>Terminal ovary mass models (migrants only- live male experiment)</b>    |        |        |      |        |
| Live male or Song                                                          | -171.8 | -161.8 |      |        |
| *Main term significant, full model retained                                |        |        |      |        |
| <b>Terminal follicle size models (migrants only- live male experiment)</b> |        |        |      |        |
| Live male or Song                                                          | -8.1   | 26.2   | 0    |        |
| *Main term significant, full model retained                                |        |        |      |        |
| <b>Terminal follicle size models (migrants only- live male experiment)</b> |        |        |      |        |
| Null model                                                                 | 93.7   | -181.4 | 0    | 0.358  |
| Live male or Song                                                          | 94.8   | -179.5 | 0.9  |        |

**Table S2. Summary of best fit model results.**

| <b>Luteinizing hormone model (all birds- song experiment)<sup>1</sup></b>    |                       |                       |        |        |        |
|------------------------------------------------------------------------------|-----------------------|-----------------------|--------|--------|--------|
| Parameter                                                                    | Estimate              | SE                    | df     | t      | p      |
| Intercept                                                                    | -0.26                 | 0.0726                | 48.9   | -3.576 | <0.001 |
| Subspecies (resident)                                                        | 0.315                 | 0.093                 | 38.9   | 3.378  | 0.002  |
| Time (days)                                                                  | 2.90*10 <sup>-3</sup> | 7.63*10 <sup>-4</sup> | 269.7  | 3.794  | <0.001 |
| <b>Follicle stage score model (all birds- song experiment)<sup>1</sup></b>   |                       |                       |        |        |        |
|                                                                              | Estimate              | SE                    | z      | p      |        |
| Fixed Effects                                                                |                       |                       |        |        |        |
| Subspecies (resident)                                                        | 1.431                 | 0.699                 | 2.048  | 0.041  |        |
| Time (days)                                                                  | 0.014                 | 0.011                 | 1.328  | 0.184  |        |
| Song                                                                         | -0.496                | 0.708                 | -0.7   | 0.484  |        |
| Subspecies * Song                                                            | 0.607                 | 0.909                 | 0.668  | 0.504  |        |
| Song * Time                                                                  | 0.017                 | 0.014                 | 1.264  | 0.206  |        |
| Subspecies* Time                                                             | 0.062                 | 0.015                 | 4.15   | <0.001 |        |
| Subspecies*Time*Song                                                         | -0.037                | 0.018                 | -2.055 | 0.0399 |        |
|                                                                              | Estimate              | SE                    | z      |        |        |
| Threshold Coefficients                                                       |                       |                       |        |        |        |
| 2 and below   2.5                                                            | 0.072                 | 0.553                 | 0.131  |        |        |
| 2.5   3                                                                      | 0.505                 | 0.555                 | 0.909  |        |        |
| 3   3.5                                                                      | 2.763                 | 0.625                 | 4.421  |        |        |
| 3.5   4                                                                      | 4.299                 | 0.687                 | 6.26   |        |        |
| 4   4.5 and above                                                            | 7.059                 | 0.841                 | 8.393  |        |        |
| <b>Terminal ovary mass model (all birds- song experiment)<sup>2</sup></b>    |                       |                       |        |        |        |
|                                                                              | Estimate              | SE                    | df     | t      | p      |
| Intercept                                                                    | -0.024                | 0.013                 | 38     | -1.843 | 0.073  |
| Subspecies (resident)                                                        | 0.045                 | 0.018                 | 38     | 2.54   | 0.015  |
| <b>Terminal oviduct mass model (all birds- song experiment)<sup>2</sup></b>  |                       |                       |        |        |        |
|                                                                              | Estimate              | SE                    | df     | t      | p      |
| Intercept                                                                    | -0.06                 | 0.043                 | 38     | -1.388 | 0.173  |
| Subspecies (resident)                                                        | 0.115                 | 0.060                 | 38     | 1.913  | 0.063  |
| <b>Terminal follicle size model (all birds- song experiment)<sup>2</sup></b> |                       |                       |        |        |        |
|                                                                              | Estimate              | SE                    | df     | t      | p      |
| Intercept                                                                    | -0.68                 | 0.224                 | 38     | -3.037 | 0.004  |
| Subspecies (resident)                                                        | 1.291                 | 0.308                 | 38     | 4.187  | <0.001 |
| <b>Mass index model (all birds- song experiment)<sup>1</sup></b>             |                       |                       |        |        |        |
| Intercept                                                                    | -1.686114             | 0.71249               | 50.1   | -2.367 | 0.0219 |
| Subspecies (resident)                                                        | 1.494245              | 0.97083               | 50.1   | 1.539  | 0.1301 |
| Time (days)                                                                  | 0.056622              | 0.00545               | 347.2  | 10.398 | <0.001 |
| Subspecies * Time                                                            | -0.070153             | 0.00746               | 347.4  | -9.406 | <0.001 |

| <b>Molt jd 90 (migrants only- song experiment)<sup>3</sup></b>                      |          |                       |        |        |        |
|-------------------------------------------------------------------------------------|----------|-----------------------|--------|--------|--------|
|                                                                                     | Estimate | SE                    | z      | p      |        |
| Song                                                                                | 1.7434   | 0.9497                | 1.836  | 0.066  |        |
|                                                                                     | Estimate | SE                    | z      |        |        |
| <b>Threshold Coefficients</b>                                                       |          |                       |        |        |        |
| 0   1                                                                               | -0.363   | 0.742                 | -0.489 |        |        |
| 1   4                                                                               | 0.297    | 0.741                 | 0.401  |        |        |
| 4   5                                                                               | 0.865    | 0.776                 | 1.115  |        |        |
| 5   6                                                                               | 1.128    | 0.795                 | 1.418  |        |        |
| 6   7                                                                               | 1.399    | 0.822                 | 1.702  |        |        |
| 7   8                                                                               | 2.952    | 1                     | 2.951  |        |        |
| * Note no scores of 2,3, or 9 observed                                              |          |                       |        |        |        |
| <b>Molt jd 104 (migrants only- song experiment)<sup>3</sup></b>                     |          |                       |        |        |        |
|                                                                                     | Estimate | SE                    | z      | p      |        |
| Song                                                                                | -2.0809  | 0.9698                | -2.146 | 0.0319 |        |
|                                                                                     | Estimate | SE                    | z      |        |        |
| <b>Threshold Coefficients</b>                                                       |          |                       |        |        |        |
| 0   1                                                                               | -2.199   | 0.902                 | -2.438 |        |        |
| 1   2                                                                               | -1.321   | 0.803                 | -1.645 |        |        |
| 2   3                                                                               | -0.762   | 0.760                 | -1.003 |        |        |
| 3   5                                                                               | 0.115    | 0.775                 | 0.149  |        |        |
| 5   8                                                                               | 1.011    | 0.892                 | 1.134  |        |        |
| 8   9                                                                               | 1.872    | 1.111                 | 1.684  |        |        |
| * Note no scores of 4, 7 or 8 observed                                              |          |                       |        |        |        |
| <b>Luteinizing hormone model (migrants only- live male experiment)<sup>1</sup></b>  |          |                       |        |        |        |
|                                                                                     | Estimate | SE                    | df     | t      | p      |
| Intercept                                                                           | -0.129   | -0.049                | 9.122  | -2.635 | 0.001  |
| Time (days)                                                                         | 0.002    | 5.36*10 <sup>-4</sup> | 161.0  | 3.581  | <0.001 |
| <b>Follicle stage score model (migrants only- live male experiment)<sup>1</sup></b> |          |                       |        |        |        |
|                                                                                     | Estimate | SE                    | z      | p      |        |
| Fixed Effects                                                                       |          |                       |        |        |        |
| Time (days)                                                                         | 0.016    | 0.011                 | 1.429  | 0.153  |        |
| Live male                                                                           | 0.403    | 0.854                 | 0.472  | 0.637  |        |
| Song                                                                                | -0.467   | 0.726                 | -0.644 | 0.520  |        |
| Time* Live male                                                                     | 0.034    | 0.017                 | 2.064  | 0.039  |        |
| Time* Song                                                                          | 0.018    | 0.014                 | 1.262  | 0.207  |        |
|                                                                                     | Estimate | SE                    | z      |        |        |
| <b>Threshold Coefficients</b>                                                       |          |                       |        |        |        |

|                                                                                       |          |        |        |        |       |
|---------------------------------------------------------------------------------------|----------|--------|--------|--------|-------|
| 2 and below   2.5                                                                     | 0.1009   | 0.6003 | 0.168  |        |       |
| 2.5   3                                                                               | 0.5372   | 0.6044 | 0.889  |        |       |
| 3   3.5                                                                               | 3.1288   | 0.7130 | 4.388  |        |       |
| 3.5   4                                                                               | 4.4895   | 0.8165 | 5.498  |        |       |
| Note that no birds scored >4.                                                         |          |        |        |        |       |
| <b>Terminal ovary mass model (migrants only- live male experiment)<sup>2</sup></b>    |          |        |        |        |       |
|                                                                                       | Estimate | SE     | df     | t      | p     |
| Intercept                                                                             | -0.003   | 0.002  | 14.587 | -1.224 | 0.240 |
| Live male                                                                             | 0.008    | 0.003  | 20.351 | 2.317  | 0.031 |
| Song                                                                                  | 0.003    | 0.003  | 20.143 | 0.934  | 0.361 |
| <b>Terminal follicle size model (migrants only- live male experiment)<sup>2</sup></b> |          |        |        |        |       |
|                                                                                       | Estimate | SE     | df     | t      | p     |
| Intercept                                                                             | -0.223   | 0.141  | 23.0   | -1.583 | 0.127 |
| Live male                                                                             | 0.563    | 0.208  | 23.0   | 2.703  | 0.013 |
| Song                                                                                  | 0.192    | 0.172  | 23.0   | 1.114  | 0.277 |
| <b>Terminal oviduct model (migrants only- live male experiment)<sup>2</sup></b>       |          |        |        |        |       |
|                                                                                       | Estimate | SE     | df     | t      | p     |
| Intercept                                                                             | -0.002   | 0.002  | 17.454 | -1.150 | 0.266 |
| Live male                                                                             | 0.003    | 0.002  | 20.335 | 1.386  | 0.181 |
| Song                                                                                  | 0.002    | 0.002  | 20.048 | 1.162  | 0.259 |

<sup>1</sup> Random effects for individual id nested within chamber position (shelf) were included

<sup>2</sup> Random effects for shelf were included.

<sup>3</sup> No random effects were included in the model.

**Table S3. Summary of post hoc test results**

| <b>Model for pre-treatment follicle stage score (all birds- song experiment)<sup>3</sup></b> |          |       |      |       |  |
|----------------------------------------------------------------------------------------------|----------|-------|------|-------|--|
|                                                                                              | Estimate | SE    | z    | p     |  |
| Fixed Effects                                                                                |          |       |      |       |  |
| Subspecies (resident)                                                                        | -0.522   | 0.956 | -0.5 | 0.585 |  |
| Song                                                                                         | -1.046   | 0.962 | -1.1 | 0.277 |  |
| Subspecies * Song                                                                            | 1.266    | 1.271 | 1    | 0.319 |  |

|                                                                                               | Estimate | SE     | z    |        |  |
|-----------------------------------------------------------------------------------------------|----------|--------|------|--------|--|
| Threshold Coefficients                                                                        |          |        |      |        |  |
| 2 and below   2.5                                                                             | -0.468   | 0.753  | -0   |        |  |
| 2.5   3                                                                                       | -0.034   | 0.747  | -0   |        |  |
| 3   3.5                                                                                       | 3.165    | 1.196  | 2.65 |        |  |
| Note that no birds scored >3.5                                                                |          |        |      |        |  |
| <b>Model for Julian date 62 follicle stage score (all birds- song experiment)<sup>3</sup></b> |          |        |      |        |  |
|                                                                                               | Estimate | SE     | z    | p      |  |
| Fixed Effects                                                                                 |          |        |      |        |  |
| Subspecies (resident)                                                                         | 5.812    | 1.642  | 3.58 | <0.001 |  |
| Song                                                                                          | 1.155    | 1.235  | 0.94 | 0.35   |  |
| Subspecies * Song                                                                             | -0.775   | 1.4825 | -0.5 | 0.601  |  |
|                                                                                               | Estimate | SE     | z    |        |  |
| Threshold Coefficients                                                                        |          |        |      |        |  |
| 2 and below   2.5                                                                             | 1.519    | 1.099  | 1.38 |        |  |
| 2.5   3                                                                                       | 2.291    | 1.16   | 1.98 |        |  |
| 3   3.5                                                                                       | 4.585    | 1.493  | 3.07 |        |  |
| 3.5   4                                                                                       | 6.709    | 1.591  | 4.22 |        |  |
| 4   4.5 and above                                                                             | 9.02     | 1.85   | 4.88 |        |  |
| <b>Model for Julian date 90 follicle stage score (all birds- song experiment)<sup>3</sup></b> |          |        |      |        |  |
|                                                                                               | Estimate | SE     | z    | p      |  |
| Fixed Effects                                                                                 |          |        |      |        |  |
| Subspecies (resident)                                                                         | 4.673    | 1.374  | 3.4  | <0.001 |  |
| Song                                                                                          | 0.568    | 1.095  | 0.52 | 0.604  |  |
| Subspecies * Song                                                                             | -2.351   | 1.449  | -1.6 | 0.105  |  |
|                                                                                               | Estimate | SE     | z    |        |  |
| Threshold Coefficients                                                                        |          |        |      |        |  |
| 2 and below   2.5                                                                             | -0.91    | -0.975 | -0.9 |        |  |
| 2.5   3                                                                                       | -0.337   | 0.988  | -0.3 |        |  |
| 3   3.5                                                                                       | 1.703    | 1.0721 | 1.59 |        |  |
| 3.5   4                                                                                       | 2.77     | 1.123  | 2.47 |        |  |
| 4   4.5 and above                                                                             | 5.87     | 1.375  | 4.27 |        |  |
| <b>Model for terminal follicle stage score (all birds- song experiment)<sup>3</sup></b>       |          |        |      |        |  |
|                                                                                               | Estimate | SE     | z    | p      |  |
| Fixed Effects                                                                                 |          |        |      |        |  |
| Subspecies (resident)                                                                         | 5.543    | 1.432  | 3.87 | <0.001 |  |
| Song                                                                                          | 0.672    | 1.069  | 0.63 | 0.529  |  |
| Subspecies * Song                                                                             | -1.797   | 1.391  | -1.3 | 0.197  |  |
|                                                                                               | Estimate | SE     | z    |        |  |
| Threshold Coefficients                                                                        |          |        |      |        |  |
| 2 and below   2.5                                                                             | -1.684   | 0.971  | -1.7 |        |  |

|                                                                              |          |       |      |        |        |
|------------------------------------------------------------------------------|----------|-------|------|--------|--------|
| Note that no birds scored a 2.5                                              |          |       |      |        |        |
| 3   3.5                                                                      | 1.492    | 1.151 | 1.53 |        |        |
| 3.5   4                                                                      | 3.083    | 1.151 | 2.68 |        |        |
| 4   4.5 and above                                                            | 5.367    | 1.319 | 4.07 |        |        |
| <b>Model for initial mass index (all birds-song experiment)<sup>2</sup></b>  |          |       |      |        |        |
|                                                                              | Estimate | SE    | df   | t      | p      |
| Intercept                                                                    | -2.291   | 0.705 | 39   | -3.25  | 0.002  |
| Subspecies (resident)                                                        | 1.673    | 0.961 | 39   | 1.741  | 0.089  |
| <b>Model for terminal mass index (all birds-song experiment)<sup>2</sup></b> |          |       |      |        |        |
|                                                                              | Estimate | SE    | df   | t      | p      |
| Intercept                                                                    | 4.043    | 0.789 | 38   | 5.126  | <0.001 |
| Subspecies (resident)                                                        | -5.442   | 1.087 | 38   | -5.005 | <0.001 |

<sup>1</sup> Random effects for individual id nested within chamber position (shelf) were included

<sup>2</sup> Random effects for shelf were included.

<sup>3</sup> No random effects were included in the model.

**Table S4. Results for supplementary analyses.**

| <b>Supplementary terminal ovary mass model (all birds- song experiment)<sup>2</sup></b>   |                         |       |    |        |       |
|-------------------------------------------------------------------------------------------|-------------------------|-------|----|--------|-------|
|                                                                                           | Estimate                | SE    | df | t      | p     |
| Intercept                                                                                 | -0.023                  | 0.02  | 38 | -1.175 | 0.247 |
| Subspecies (resident)                                                                     | 0.018                   | 0.025 | 38 | 0.714  | 0.48  |
| Structural Size                                                                           | 5.676 *10 <sup>-4</sup> | 0.022 | 38 | 0.026  | 0.979 |
| Subspecies* Structural Size                                                               | 0.04                    | 0.026 | 38 | 1.513  | 0.139 |
| <b>Supplementary terminal oviduct mass model (all birds- song experiment)<sup>2</sup></b> |                         |       |    |        |       |
|                                                                                           | Estimate                | SE    | df | t      | p     |
| Intercept                                                                                 | -0.058                  | 0.068 | 38 | -0.857 | 0.397 |
| Subspecies (resident)                                                                     | 0.028                   | 0.085 | 38 | 0.332  | 0.742 |
| Structural Size                                                                           | 0.003                   | 0.075 | 38 | 0.04   | 0.968 |
| Subspecies* Structural Size                                                               | 0.125                   | 0.091 | 38 | 1.372  | 0.178 |
| <b>Supplementary follicle size model (all birds- song experiment)<sup>2</sup></b>         |                         |       |    |        |       |
|                                                                                           | Estimate                | SE    | df | t      | p     |
| Intercept                                                                                 | -0.681                  | 0.332 | 38 | -2.049 | 0.047 |
| Subspecies (resident)                                                                     | 0.746                   | 0.417 | 38 | 1.787  | 0.082 |
| Structural Size                                                                           | -0.003                  | 0.365 | 38 | -0.007 | 0.995 |
| Subspecies* Structural Size                                                               | 0.834                   | 0.446 | 38 | 1.868  | 0.069 |

<sup>1</sup> Random effects for individual id nested within chamber position (shelf) were included

<sup>2</sup> Random effects for shelf were included.

<sup>3</sup> No random effects were included in the model.
